# Supplementary material
Source: PubMed Central journal article supplement (PMC2911310)

### Supplemental Figure S1

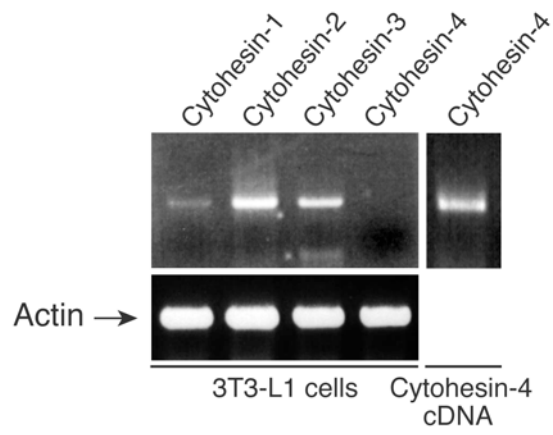

Supplement: supp_M110.125658_jbc.M110.125658-2.pdf [file supp_M110.125658_jbc.M110.125658-2.pdf]

## Supplemental Figure S2

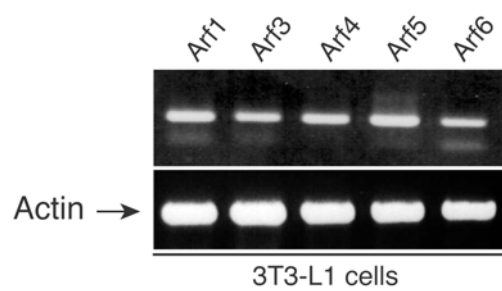

Supplement: supp_M110.125658_jbc.M110.125658-3.pdf [file supp_M110.125658_jbc.M110.125658-3.pdf]
